# Supplementary material for: Translation, cross-cultural adaptation and measurement proprieties of the German version of the Allodynia Symptom Checklist (ASC-12)
Source: Springer Nature journal article supplement (doi:10.1186/s10194-023-01697-9), 2023-12-01
Supplement: MOESM1 [file 26480572]

## 12-item Allodynie Symptom Checkliste (ASC-12) – German version

Wie oft haben Sie während Ihrer stärksten Kopfschmerzen eine unangenehme Hautempfindung oder verstärkte Schmerzen bei folgenden Handlungen?

|                                                                              | betrifft<br>mich nicht <sup>0</sup> | Niemals <sup>0</sup> | Selten <sup>0</sup> | in weniger als<br>der Hälfte der Zeit <sup>1</sup> | in der Hälfte der<br>Zeit oder mehr <sup>2</sup> |
|------------------------------------------------------------------------------|-------------------------------------|----------------------|---------------------|----------------------------------------------------|--------------------------------------------------|
| beim Haare kämmen                                                            |                                     |                      |                     |                                                    |                                                  |
| beim Zurückhalten der Haare (z. B. Pferdeschwanz)                            |                                     |                      |                     |                                                    |                                                  |
| beim Gesicht rasieren                                                        |                                     |                      |                     |                                                    |                                                  |
| beim Tragen von Brillen                                                      |                                     |                      |                     |                                                    |                                                  |
| beim Tragen von Kontaktlinsen                                                |                                     |                      |                     |                                                    |                                                  |
| beim Tragen von Ohrringen                                                    |                                     |                      |                     |                                                    |                                                  |
| beim Tragen einer Halskette                                                  |                                     |                      |                     |                                                    |                                                  |
| beim Tragen enger Kleidung                                                   |                                     |                      |                     |                                                    |                                                  |
| beim Duschen (wenn das Duschwasser auf Ihr Gesicht prasselt)                 |                                     |                      |                     |                                                    |                                                  |
| beim Ablegen des Gesichts oder Kopfes auf einem Kissen                       |                                     |                      |                     |                                                    |                                                  |
| bei Hitze (z.B. Kochen, Waschen des Gesichts mit heißem Wasser)              |                                     |                      |                     |                                                    |                                                  |
| bei Kälte (z.B. mit einem Kühlpacks, Waschen des Gesichts mit kaltem Wasser) |                                     |                      |                     |                                                    |                                                  |
| <b>Summe:</b>                                                                |                                     |                      |                     |                                                    |                                                  |
| <b>Gesamtsumme:</b>                                                          |                                     |                      |                     |                                                    |                                                  |

| Allodynie | Summe       |
|-----------|-------------|
| keine     | 0-2         |
| leichte   | 3-5         |
| moderate  | 6-8         |
| schwere   | 9 oder mehr |
